# Supplementary material
Source: MDPI journal article supplement (https://www.mdpi.com/1099-4300/19/10/543)
Supplement: s1 [file s1]

## Supporting Data Information

### *“Is Cetacean Intelligence special? New Perspectives on the Debate”*

The data provided contains a Wolfram Mathematica notebook (file formulae.nb) with the equations of the average entropy  $S(\mu_k, \mu_m)$ , the average free energy  $F(\mu_k, \mu_m)$  (see Supplementary figure 1), and the logarithm of average number of brain representations  $R(\mu_k, \mu_m)$  (function  $R_2(\mu_k, \mu_m) \equiv \text{Log}(R(\mu_k, \mu_m))$  in the mathematica notebook) for generating the data.

The necessary data for plotting the graphs of the entropy  $S(\mu_k, \mu_m)$ , the free energy  $F(\mu_k, \mu_m)$ , and brain representations  $R(\mu_k, \mu_m)$  according to the research presented in the manuscript is also provided in text files together with a Matlab workspace file (IntCetENTROPY.mat) containing these data for ease of use. More specifically, the data provided is for values of the average number of information-processing levels  $\mu_k$  in the integer set  $\{2,3,8,9,12\}$  and within the integer interval  $[2..50]$  for the model parameter  $\mu_m$  (i.e., average connectivity between brain representations).

The notation used to denote the attached text files is as follows: letter “s” to denote entropy data, letter “f” to denote free energy data, and letter “r” to denote brain representations data.

- Files s2,s3,s8,s9 and s12 contains the raw data values of the function  $S(\mu_k, \mu_m)$  within the range of  $\mu_k$  and  $\mu_m$  commented above.
- Files f2,f3,f8,f9, and f12 are the files containing the raw data values of the function  $F(\mu_k, \mu_m)$ . Similarly, the files f2n,f3n,f8n,f9n, and f12n contains the data of  $F(\mu_k, \mu_m)$  scaled between  $[0,-1]$  for visualization purposes.
- Files r2,r3,r8,r9 and r12 contains the data of  $\text{Log}(R(\mu_k, \mu_m))$ , specifically the natural logarithm of the values provided by the function  $R(\mu_k, \mu_m)$  within the range of  $\mu_k$  and  $\mu_m$  commented above. The logarithm of the function  $R(\mu_k, \mu_m)$  was used for better visualization purposes due to the hyperexponential growth of this function.

Please note that the graphs of the entropy function  $S(\mu_k, \mu_m)$ , free energy function  $F(\mu_k, \mu_m)$  and brain representations numbers function  $R(\mu_k, \mu_m)$  that appear in the manuscript were plotted as follow:

- The raw data of the entropy function  $S(\mu_k, \mu_m)$  (i.e., s2,s3,s8,s9, and s12) were plotted using a logarithmic scale.
- The scaled data of the free energy function  $F(\mu_k, \mu_m)$  (i.e., f2n,f3n,f8n,f9n, and f12n) were plotted using a linear scale.

- The raw data of the brain representations function (i.e., r2,r3,r8,r9, and r12) were plotted using a linear scale (remember that these files contain the values of  $\text{Log}(R(\mu_k, \mu_m))$ ). The graphs corresponding to this function that appear in Figures 1 and 2 of the manuscript were plotted using different zooming factors for better visualization purposes.

$$\begin{aligned}
F(\beta, \mu_k, \mu_m) &= \frac{1 - \mu_m^{\mu_k}}{1 - \mu_m} \left\{ 1 - \right. \\
&\quad \left. - \frac{1}{\beta} \log \left( 1 + \sum_{l \geq 2}^{\mu_m} \binom{\mu_m}{l} e^{-\beta(l-1)} A_l^l \right) \right\} \\
S(\beta, \mu_k, \mu_m) &= \beta \frac{1 - \mu_m^{\mu_k}}{1 - \mu_m} \left\{ \frac{\sum_{l \geq 2}^{\mu_m} \binom{\mu_m}{l} (l-1) e^{-\beta(l-1)} A_l^l}{1 + \sum_{l \geq 2}^{\mu_m} \binom{\mu_m}{l} e^{-\beta(l-1)} A_l^l} + \right. \\
&\quad \left. + \frac{1}{\beta} \log \left( 1 + \sum_{l \geq 2}^{\mu_m} \binom{\mu_m}{l} e^{-\beta(l-1)} A_l^l \right) \right\}
\end{aligned}$$

**Supplementary Figure 1.** Equations of the average Entropy and the average Free Energy. This equations are coded in the attached wolfram mathematica notebook (formulae.nb) for a value of  $\beta = 1$  (see [9] for further details) together with the function  $\text{Log}(R(\mu_k, \mu_m))$  for generating the data.

$R(\mu_k, \mu_m) \equiv$  Average number of brain representations  $\equiv$  **Proxy for neuron numbers**

$S(\mu_k, \mu_m) \equiv$  Average Entropy  $\equiv$  **Proxy for intelligence**

$|F(\mu_k, \mu_m)| \equiv$  Absolute value of the average Free Energy  $\equiv$  **Proxy for metabolic costs**

Tables 1,2,3, and 4 contain data obtained when evaluating the functions  $R(\mu_k, \mu_m)$ ,  $S(\mu_k, \mu_m)$ , and  $|F(\mu_k, \mu_m)|$  for a set values of the model parameters to illustrate the principal results of the study. Several examples (denoted as (a), (b) and (c) ) are provided using these data. Please note that the values that are shown in the aforementioned tables are the result of applying logarithms to the corresponding values of the functions  $R(\mu_k, \mu_m)$  (average number of representations),  $S(\mu_k, \mu_m)$  (average entropy), and  $|F(\mu_k, \mu_m)|$  (average free energy).

- (a)  $S(12,18) \cong \frac{S(9,45) + S(9,46)}{2} = 35.4312$  and  $|F(12,18)| < \frac{|F(9,45)| + |F(9,46)|}{2} = 35.0321$  but also  $R(12,18) > \frac{R(9,45) + R(9,46)}{2} = 2.4725 \times 10^{15}$
- (b)  $S(12,3) \cong S(5,12)$  and  $|F(12,3)| < |F(5,12)|$  but also  $R(12,3) > R(5,12)$
- (c)  $S(12,3) \cong S(3,52)$  and  $|F(12,3)| < |F(3,52)|$  but also  $R(12,3) > R(3,52)$

**Table 1:** Average Number of information-processing levels equal to 12 ( $\mu_k = 12$ )

|                     | $\mu_m = 2$ | $\mu_m = 3$ | $\mu_m = 4$       | $\mu_m = 5$       | $\mu_m = 6$           | ... | $\mu_m = 15$            | $\mu_m = 16$            | $\mu_m = 17$          | $\mu_m = 18$            | $\mu_m = 19$            |
|---------------------|-------------|-------------|-------------------|-------------------|-----------------------|-----|-------------------------|-------------------------|-----------------------|-------------------------|-------------------------|
| $R(\mu_k, \mu_m)$   | 2838.4      | 476106      | $1.7 \times 10^7$ | $2.9 \times 10^8$ | $1.96 \times 10^{10}$ | ... | $2.5855 \times 10^{14}$ | $5.7555 \times 10^{14}$ | $1.22 \times 10^{15}$ | $2.4766 \times 10^{15}$ | $4.8373 \times 10^{15}$ |
| $S(\mu_k, \mu_m)$   | 7.77        | 12.93       | 16.55             | 19.35             | 21.6483               | ... | 33.1496                 | 33.9532                 | 34.7074               | 35.4178                 | 36.0894                 |
| $ F(\mu_k, \mu_m) $ | 7.94        | 10.48       | 14.94             | 18.22             | 20.69                 | ... | 32.5398                 | 33.3597                 | 34.1287               | 34.8527                 | 35.5366                 |

**Table 2:** Average Number of information-processing levels equal to 9 ( $\mu_k = 9$ )

|                     | $\mu_m = 40$            | $\mu_m = 41$            | $\mu_m = 42$            | $\mu_m = 43$            | $\mu_m = 44$            | $\mu_m = 45$                              | $\mu_m = 46$                              |
|---------------------|-------------------------|-------------------------|-------------------------|-------------------------|-------------------------|-------------------------------------------|-------------------------------------------|
| $R(\mu_k, \mu_m)$   | $7.4153 \times 10^{14}$ | $9.3331 \times 10^{14}$ | $1.1681 \times 10^{15}$ | $1.4543 \times 10^{15}$ | $1.8014 \times 10^{15}$ | <b><math>2.2205 \times 10^{15}</math></b> | <b><math>2.7246 \times 10^{15}</math></b> |
| $S(\mu_k, \mu_m)$   | 34.2306                 | 34.461                  | 34.6857                 | 34.9051                 | 35.1193                 | <b>35.3288</b>                            | <b>35.5336</b>                            |
| $ F(\mu_k, \mu_m) $ | 33.8136                 | 34.0475                 | 34.2756                 | 34.4983                 | 34.7158                 | <b>34.9283</b>                            | <b>35.136</b>                             |

**Table 3:** Average Number of information-processing levels equal to 5 ( $\mu_k = 5$ )

|                     | $\mu_m = 2$ | $\mu_m = 3$ | $\mu_m = 4$ | $\mu_m = 5$ | $\mu_m = 6$ | $\mu_m = 7$ | $\mu_m = 8$ | $\mu_m = 9$ | $\mu_m = 10$ | $\mu_m = 11$ | $\mu_m = 12$  |
|---------------------|-------------|-------------|-------------|-------------|-------------|-------------|-------------|-------------|--------------|--------------|---------------|
| $R(\mu_k, \mu_m)$   | 21.487      | 216.8       | 1083        | 3729        | 10230       | 23879       | 49640       | 94490       | 167825       | 281875       | <b>452131</b> |
| $S(\mu_k, \mu_m)$   | 2.89        | 5.23        | 6.84        | 8.08        | 9.1         | 9.96        | 10.71       | 11.37       | 11.96        | 12.49        | <b>12.97</b>  |
| $ F(\mu_k, \mu_m) $ | 3.05        | 2.79        | 5.24        | 6.95        | 8.15        | 9.1         | 9.91        | 10.61       | 11.23        | 11.79        | <b>12.29</b>  |

**Table 4:** Average Number of information-processing levels equal to 3 ( $\mu_k = 3$ )

|                     | $\mu_m = 50$ | $\mu_m = 51$ | $\mu_m = 52$ | $\mu_m = 53$ | $\mu_m = 54$ | $\mu_m = 55$ |
|---------------------|--------------|--------------|--------------|--------------|--------------|--------------|
| $R(\mu_k, \mu_m)$   | 378767       | 404343       | 431087       | 459028       | 488195       | 518617       |
| $S(\mu_k, \mu_m)$   | 12.8379      | 12.9034      | 12.9676      | 13.0306      | 13.099       | 13.153       |
| $ F(\mu_k, \mu_m) $ | 12.4514      | 12.5194      | 12.5861      | 12.6514      | 12.7155      | 12.7783      |
