# Supplementary material
Source: MDPI journal article supplement (https://www.mdpi.com/1099-4300/19/10/543)
Supplement: s1 [file s1]

### Free Energy:

```
>> load IntCetRSOP.mat
>> plot(x,f2n,'-yp',x,f3n,':g^',x,f8n,'--rd',x,f9n,'-ch',x,f12n,'-bs','LineWidth',2)
>> grid
>> xlabel('Average Neural Connectivity')
>> ylabel('Free Energy (Metabolic Costs)')
>> legend('\mu_{k}=2','\mu_{k}=3','\mu_{k}=8','\mu_{k}=9','\mu_{k}=12')
```

**Entropy:** after using the matlab commands that are shown below, the plotting tools of MATLAB must be used to display the vertical axe in a logarithmic scale (Property editor -> Axes -> Y Scale-> Log)

```
>> plot(x,s2,'-yp',x,s3,':g^',x,s8,'--rd',x,s9,'-ch',x,s12,'-bs','LineWidth',2)
>> grid
>> xlabel('Average Neural Connectivity')
>> ylabel('Entropy (Intelligence)')
```

**Brain Representations:** after using the matlab commands that are shown below, the plotting tools of MATLAB must be used to apply different zooming factors to the graph (Property editor -> Axes -> Y Limits).

```
>> plot(x,r2,'-yp',x,r3,':g^',x,r8,'--rd',x,r9,'-ch',x,r12,'-bs','LineWidth',2)
>> grid
>> xlabel('Average Neural Connectivity')
>> ylabel('Brain Representations (Neuron Numbers)')
```
